# Supplementary material
Source: PubMed Central journal article supplement (PMC3725591)

A

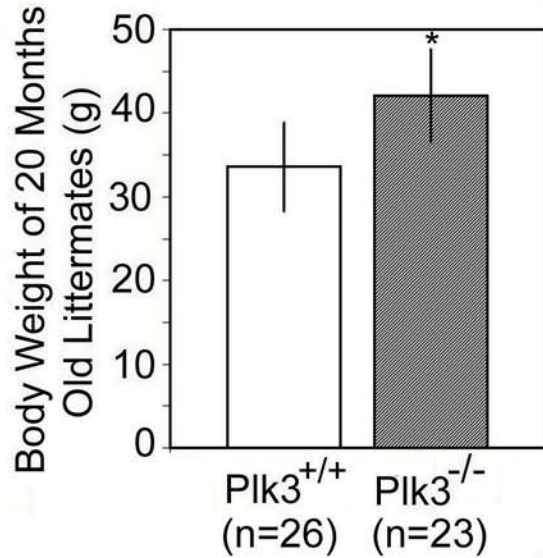

Table 1: Tumor development in *Plk3*<sup>+/+</sup> vs *Plk3*<sup>-/-</sup> littermates

| Tumor Type                           | Lung     | Liver     | Kidney   | Intestine | Uterus   | Total # of tumors |
|--------------------------------------|----------|-----------|----------|-----------|----------|-------------------|
| <i>Plk3</i> <sup>+/+</sup><br>(n=21) | 2 (9.5%) | 0         | 0        | 0         | 0        | 2 (9.5%)          |
| <i>Plk3</i> <sup>-/-</sup><br>(n=26) | 8(30.8%) | 5 (19.2%) | 2 (7.6%) | 1 (3.8%)  | 2 (7.6%) | 18 (69.2%)        |

Table 2: Ectopic expression of *Plk3*-KD suppresses HIF-1 $\alpha$  induction

| Constructs             | GFP | <i>Plk3</i> -FL | <i>Plk3</i> -PBD | <i>Plk3</i> -KD | <i>Plk3</i> -KD <sup>T219D</sup> |
|------------------------|-----|-----------------|------------------|-----------------|----------------------------------|
| HIF-1 $\alpha$ Signals | 1.0 | 0.7             | 1.3              | 0.5             | 1.2                              |

Approximately equal amounts of proteins from cells transfected with various expression constructs and treated with nickel ions, as shown in Figure 6C, were blotted for HIF-1 $\alpha$ . Specific HIF-1 $\alpha$  signals were quantitated by densitometry. After normalizing with  $\beta$ -actin signals, HIF-1 $\alpha$  signals are presented (arbitrary unit). The data were summarized from two independent experiments.

A

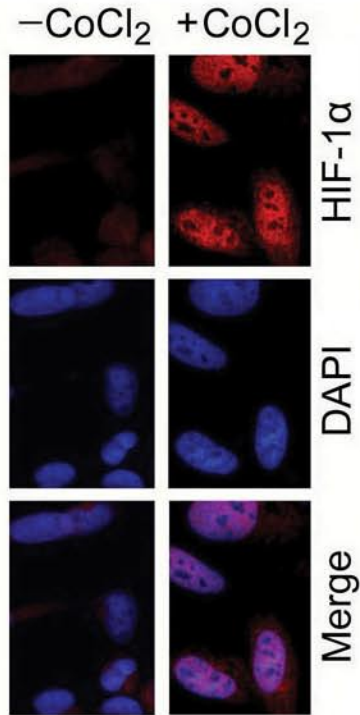

B

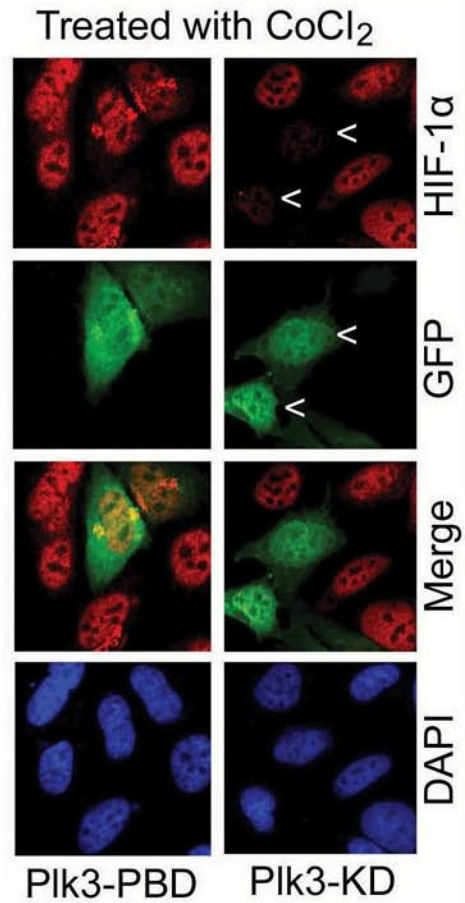

A. HeLa cells treated with CoCl<sub>2</sub> for 4 h were stained with the HIF-1 $\alpha$  antibody (red). DNA was stained with DAPI (blue). Representative cells are shown.  
 B. HeLa cells transfected with various expression constructs for 24 h and then treated with CoCl<sub>2</sub> for 4 h were stained with antibodies to HIF-1 $\alpha$  (red) and GFP (green). DNA was stained with DAPI (blue). Representative cells are shown. Arrowheads indicate PIk3-KD-expressing cells with suppressed accumulation of nuclear HIF-1 $\alpha$  after CoCl<sub>2</sub> treatment.

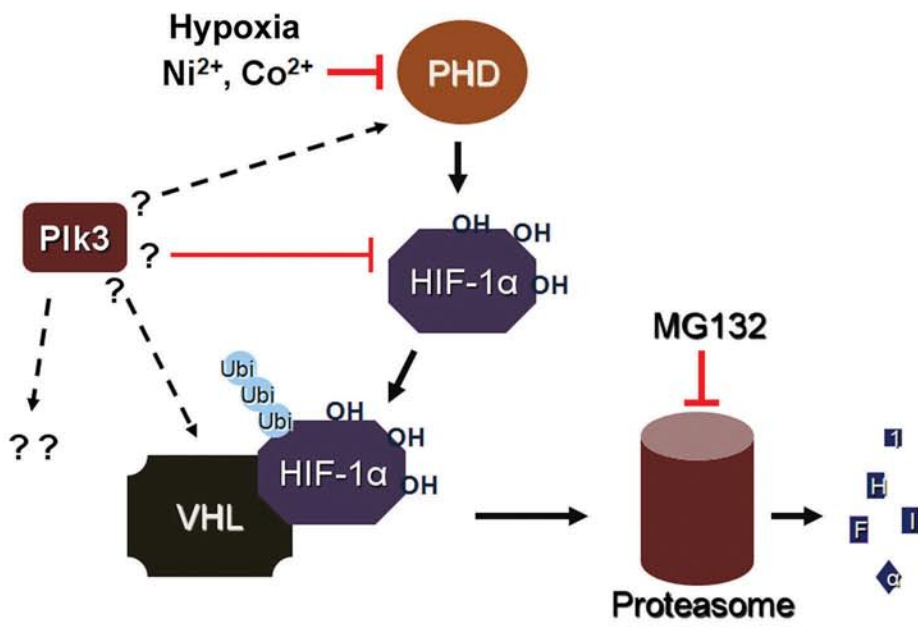

Supplement: NIHMS492570-supplement-01.pdf [file NIHMS492570-supplement-01.pdf]
